# Supplementary material
Source: PubMed Central journal article supplement (PMC10863994)
Supplement: NIHMS1937814-supplement-Supplementary_Tables_and_Figures.pdf [file NIHMS1937814-supplement-Supplementary_Tables_and_Figures.pdf]

**Supplementary table 1: ffERG Z scoring system**

| Score | ffERG response amplitude                                       | ffERG response timing                                       |
|-------|----------------------------------------------------------------|-------------------------------------------------------------|
| 5     | Amplitude within 2 Z scores (SD) from mean<br>(Normal for age) | Timing within 2 Z scores (SD) from mean<br>(Normal for age) |
| 4     | Z score $< -2, \geq -3$                                        | Z score $> 2, \leq 3$                                       |
| 3     | Z score $< -3, \geq -4$                                        | Z score $> 3, \leq 4$                                       |
| 2     | Z score $< -4, \geq -5$                                        | Z score $> 4, \leq 5$                                       |
| 1     | Z score $< -5$                                                 | Z score $> 5$                                               |
| 0     | No response                                                    | No response                                                 |

**ffERG:** full field electroretinogram; **SD:** standard deviation

**Overall ffERG score equals the mean of individual response scores + 1 for present oscillatory potential in both scotopic and photopic conditions. If oscillatory potential is present in only one condition, only +0.5 will be added.**

Supplementary table 2: Baseline clinical characteristics

| PATIENT | BCVA   |        | Lens status  |              | Vitreous cells |     | Vitreous haze |     | OCT             |                   |
|---------|--------|--------|--------------|--------------|----------------|-----|---------------|-----|-----------------|-------------------|
|         | OD     | OS     | OD           | OS           | OD             | OS  | OD            | OS  | OD              | OS                |
| 1       | 20/20  | 20/25  | Clear lens   | Pseudophakic | 0              | 0   | 0             | 1   | Normal          | Normal            |
| 2       | 20/20  | 20/20  | Clear lens   | Clear lens   | 0              | 0   | 0             | 0   | Normal          | Normal            |
| 3       | 20/25  | 20/25  | Clear lens   | Clear lens   | 1              | 1   | 1             | 1   | N/A             | N/A               |
| 4       | 20/20  | 20/50  | NS 1+        | NS 1+        | 0              | 0   | 0             | 0   | Normal          | N/A               |
| 5       | 20/20  | 20/25  | Clear lens   | Clear lens   | 0              | 0   | 0             | 0   | Normal          | Normal            |
| 6       | 20/20  | 20/20  | Clear lens   | Clear lens   | 0              | 0   | 0             | 0   | Normal          | Normal            |
| 7       | 20/40  | -      | Clear lens   | -            | 0              | -   | 0             | -   | Normal          | -                 |
| 8       | 20/20  | 20/20  | Clear lens   | Clear lens   | 0              | 0   | 0             | 2   | Normal          | Subfoveal deposit |
| 9       | 20/40  | 20/25  | NS 1+        | NS 1+        | 0              | 0   | 0.5           | 0.5 | Normal          | Normal            |
| 10      | -      | 20/20  | -            | Clear lens   | -              | 0   | -             | 0.5 | -               | Normal            |
| 11      | -      | 20/25  | -            | Clear lens   | -              | 0   | -             | 0   | -               | Normal            |
| 12      | 20/125 | 20/20  | Clear lens   | Clear lens   | 0              | 0   | 0             | 0   | Foveal thinning | Foveal thinning   |
| 13      | 20/40  | 20/20  | NS 1+        | NS 1+        | 1              | 0.5 | 1             | 0   | ERM             | Normal            |
| 14      | 20/25  | 20/25  | Clear lens   | Clear lens   | 0              | 0   | 1             | 1   | Foveal thinning | Foveal thinning   |
| 15      | 20/80  | -      | Aphakic      | -            | 0              | -   | 0             | -   | Normal          | -                 |
| 16      | 20/30  | 20/30  | Clear lens   | Clear lens   | 2              | 2   | 1             | 1   | Normal          | Normal            |
| 17      | 20/40  | 20/25  | NS 1+        | NS 1+        | 0.5            | 3   | 1             | 0.5 | ME, ERM         | ME, ERM           |
| 18      | 20/40  | 20/250 | Clear lens   | Clear lens   | 0              | 0   | 0             | 0   | Normal          | ME                |
| 19      | -      | 20/50  | -            | Clear lens   | -              | 0.5 | -             | 0   | -               | Foveal thinning   |
| 20      | 20/25  | -      | Pseudophakic | -            | 0              | -   | 0             | -   | ERM             | -                 |

BCVA: best corrected visual acuity; OCT: optical coherence tomography; OD: right eye; OS: left eye; NS: Nuclear sclerosis; ERM: epiretinal membrane; ME: macular edema

Supplementary table 3: Gradings of fundus fluorescein angiography findings

| Patient | Optic disc staining/leakage (Max 3) |    | Macular leakage (Max 4) |    | Central vascular leakage/staining (Max 3) |    | Peripheral vascular leakage/staining (Max 4) |    | Central extrafoveal capillary leakage (Max 2) |    | Peripheral capillary leakage (Max 8) |    | Macular ischemia (Max 2) |    | Peripheral ischemia (Max 4) |    | Total FFA grading* |    |
|---------|-------------------------------------|----|-------------------------|----|-------------------------------------------|----|----------------------------------------------|----|-----------------------------------------------|----|--------------------------------------|----|--------------------------|----|-----------------------------|----|--------------------|----|
|         | OD                                  | OS | OD                      | OS | OD                                        | OS | OD                                           | OS | OD                                            | OS | OD                                   | OS | OD                       | OS | OD                          | OS | OD                 | OS |
| 1       | 1                                   | 2  | 2                       | 3  | 1                                         | 1  | 2                                            | 4  | 1                                             | 2  | 4                                    | 8  | 0                        | 0  | 0                           | 0  | 11                 | 20 |
| 2       | 2                                   | 2  | 4                       | 4  | 2                                         | 2  | 4                                            | 4  | 2                                             | 2  | 8                                    | 7  | 0                        | 0  | 1                           | 1  | 23                 | 22 |
| 3       | 3                                   | 2  | 2                       | 1  | 3                                         | 3  | 4                                            | 4  | 1                                             | 1  | 6                                    | 4  | 0                        | 0  | 0                           | 0  | 19                 | 15 |
| 4       | 1                                   | 2  | 0                       | 2  | 0                                         | 0  | 0                                            | 0  | 1                                             | 1  | 4                                    | 8  | 0                        | 0  | 0                           | 1  | 6                  | 14 |
| 5       | 1                                   | 3  | 1                       | 2  | 0                                         | 0  | 1                                            | 0  | 0                                             | 1  | 6                                    | 7  | 0                        | 0  | 0                           | 1  | 9                  | 14 |
| 6       | 0                                   | 3  | 0                       | 0  | 0                                         | 0  | 4                                            | 4  | 0                                             | 0  | 0                                    | 0  | 0                        | 0  | 1                           | 0  | 5                  | 7  |
| 7       | 1                                   | -  | 0                       | -  | 0                                         | -  | 1                                            | -  | 1                                             | -  | 0                                    | -  | 0                        | -  | 0                           | -  | 3                  | -  |
| 8       | 3                                   | 2  | 2                       | 2  | 1                                         | 1  | 1                                            | 1  | 1                                             | 1  | 5                                    | 5  | 0                        | 0  | 0                           | 0  | 13                 | 12 |
| 9       | 1                                   | 1  | 0                       | 0  | 0                                         | 0  | 1                                            | 1  | 0                                             | 0  | 2                                    | 2  | 0                        | 0  | 0                           | 0  | 4                  | 4  |
| 10      | -                                   | 3  | -                       | 0  | -                                         | 2  | -                                            | 4  | -                                             | 0  | -                                    | 0  | -                        | 0  | -                           | 0  | -                  | 9  |
| 11      | -                                   | 0  | -                       | 0  | -                                         | 0  | -                                            | 3  | -                                             | 1  | -                                    | 2  | -                        | 0  | -                           | 2  | -                  | 8  |
| 12      | 1                                   | 0  | 0                       | 0  | 0                                         | 0  | 1                                            | 1  | 0                                             | 0  | 1                                    | 1  | 0                        | 0  | 0                           | 0  | 3                  | 2  |
| 13      | 3                                   | 1  | 2                       | 0  | 3                                         | 0  | 4                                            | 3  | 2                                             | 0  | 8                                    | 2  | 0                        | 0  | 0                           | 0  | 22                 | 6  |
| 14      | 3                                   | 3  | 1                       | 2  | 3                                         | 3  | 4                                            | 3  | 2                                             | 2  | 6                                    | 6  | 1                        | 0  | 2                           | 2  | 22                 | 21 |
| 15      | 2                                   | -  | 1                       | -  | 0                                         | -  | 1                                            | -  | 1                                             | -  | 4                                    | -  | 0                        | -  | 0                           | -  | 9                  | -  |
| 16      | 2                                   | 1  | 1                       | 2  | 0                                         | 1  | 4                                            | 4  | 1                                             | 1  | 6                                    | 6  | 0                        | 0  | 0                           | 1  | 14                 | 16 |
| 17      | 3                                   | 3  | 4                       | 3  | 2                                         | 2  | 4                                            | 4  | 2                                             | 2  | 8                                    | 6  | 0                        | 0  | 0                           | 0  | 23                 | 20 |
| 18      | 2                                   | 3  | 2                       | 4  | 0                                         | 0  | 0                                            | 0  | 2                                             | 2  | 6                                    | 6  | 0                        | 0  | 0                           | 1  | 12                 | 16 |
| 19      | -                                   | 3  | -                       | 0  | -                                         | 1  | -                                            | 4  | -                                             | 1  | -                                    | 7  | -                        | 0  | -                           | 0  | -                  | 16 |
| 20      | 1                                   | -  | 0                       | -  | 0                                         | -  | 2                                            | -  | 1                                             | -  | 3                                    | -  | 0                        | -  | 2                           | -  | 9                  | -  |

\* All patients did not show retinal neovascularization or pooling in their FFAs.

FFA: Fundus fluorescein angiography

Supplementary table 4: Full field electroretinogram scores

| Patient | scotopic 0.01 b wave (rod) response amplitude |    | scotopic 0.01 b wave (rod) response timing |    | scotopic 3.0 (mixed) a wave amplitude |    | scotopic 3.0 (mixed) b wave amplitude |    | scotopic 3.0 (mixed) b wave timing |    | photopic 3.0 b wave (cone) amplitude |    | photopic 3.0 b wave (cone) timing |    | 30 Hz 3.0 photopic cone flicker amplitude |    | 30 Hz 3.0 photopic cone flicker timing |    | Oscillatory potentials |     | Overall ffERG score |      | b/a ratio |      |    |    |
|---------|-----------------------------------------------|----|--------------------------------------------|----|---------------------------------------|----|---------------------------------------|----|------------------------------------|----|--------------------------------------|----|-----------------------------------|----|-------------------------------------------|----|----------------------------------------|----|------------------------|-----|---------------------|------|-----------|------|----|----|
|         | Max (5)                                       |    | Max (5)                                    |    | Max (5)                               |    | Max (5)                               |    | Max (5)                            |    | Max (5)                              |    | Max (5)                           |    | Max (5)                                   |    | Max (5)                                |    | Max (1)                |     | Max (6)             |      |           |      |    |    |
|         | OD                                            | OS | OD                                         | OS | OD                                    | OS | OD                                    | OS | OD                                 | OS | OD                                   | OS | OD                                | OS | OD                                        | OS | OD                                     | OS | OD                     | OS  | OD                  | OS   | OD        | OS   | OD | OS |
| 1       | 4                                             | 5  | 4                                          | 4  | 4                                     | 4  | 5                                     | 5  | 5                                  | 5  | 5                                    | 5  | 5                                 | 4  | 4                                         | 4  | 5                                      | 1  | 1                      | 1   | 5.6                 | 5.1  | 3.39      | 2.64 |    |    |
| 2       | 5                                             | 5  | 2                                          | 5  | 5                                     | 5  | 5                                     | 5  | 5                                  | 5  | 5                                    | 5  | 5                                 | 5  | 5                                         | 2  | 2                                      | 1  | 1                      | 5.3 | 5.7                 | 2.37 | 2.82      |      |    |    |
| 3       | 5                                             | 5  | 5                                          | 5  | 5                                     | 5  | 5                                     | 5  | 5                                  | 5  | 3                                    | 5  | 5                                 | 3  | 3                                         | 4  | 5                                      | 1  | 1                      | 5.7 | 5.6                 | 1.63 | 2.34      |      |    |    |
| 4       | 5                                             | 5  | 5                                          | 2  | 5                                     | 3  | 5                                     | 5  | 5                                  | 5  | 5                                    | 5  | 5                                 | 5  | 3                                         | 5  | 1                                      | 1  | 1                      | 6.0 | 4.8                 | 2.79 | 4.20      |      |    |    |
| 5       | 5                                             | 5  | 5                                          | 4  | 5                                     | 5  | 5                                     | 5  | 5                                  | 5  | 5                                    | 5  | 5                                 | 5  | 5                                         | 5  | 4                                      | 1  | 1                      | 6.0 | 5.8                 | 1.86 | 2.09      |      |    |    |
| 6       | 5                                             | 5  | 5                                          | 5  | 5                                     | 5  | 5                                     | 5  | 5                                  | 5  | 5                                    | 5  | 5                                 | 5  | 5                                         | 5  | 5                                      | 1  | 1                      | 6.0 | 6.0                 | 1.60 | 1.64      |      |    |    |
| 7       | 4                                             | -  | 0                                          | -  | 2                                     | -  | 5                                     | -  | 5                                  | -  | 3                                    | -  | 5                                 | -  | 5                                         | -  | 3                                      | -  | 1                      | -   | 4.6                 | -    | 2.86      | -    |    |    |
| 8       | 4                                             | 5  | 5                                          | 5  | 4                                     | 5  | 5                                     | 5  | 5                                  | 5  | 4                                    | 4  | 4                                 | 4  | 3                                         | 4  | 1                                      | 2  | 1                      | 1   | 4.9                 | 5.3  | 2.03      | 1.69 |    |    |
| 9       | 5                                             | 2  | 5                                          | 5  | 5                                     | 5  | 1                                     | 1  | 5                                  | 5  | 1                                    | 1  | 3                                 | 4  | 3                                         | 4  | 2                                      | 1  | 1                      | 1   | 4.3                 | 4.1  | 1.16      | 0.36 |    |    |
| 10      | -                                             | 5  | -                                          | 5  | -                                     | 5  | -                                     | 5  | -                                  | 5  | -                                    | 5  | -                                 | 5  | -                                         | 5  | -                                      | 1  | -                      | 1   | -                   | 5.6  | -         | 2.20 |    |    |
| 11      | -                                             | 4  | -                                          | 5  | -                                     | 3  | -                                     | 5  | -                                  | 5  | -                                    | 5  | -                                 | 5  | -                                         | 4  | -                                      | 5  | -                      | 1   | -                   | 5.6  | -         | 2.12 |    |    |
| 12      | 5                                             | 5  | 5                                          | 5  | 5                                     | 5  | 5                                     | 5  | 5                                  | 5  | 4                                    | 4  | 5                                 | 5  | 5                                         | 5  | 5                                      | 4  | 1                      | 1   | 5.9                 | 5.8  | 1.53      | 1.50 |    |    |
| 13      | 5                                             | 5  | 1                                          | 2  | 5                                     | 5  | 5                                     | 5  | 5                                  | 5  | 5                                    | 4  | 3                                 | 5  | 5                                         | 5  | 1                                      | 5  | 1                      | 1   | 4.9                 | 5.6  | 2.05      | 1.85 |    |    |
| 14      | 0                                             | 0  | 0                                          | 0  | 1                                     | 0  | 1                                     | 0  | 5                                  | 0  | 0                                    | 0  | 0                                 | 0  | 1                                         | 0  | 1                                      | 0  | 0                      | 0   | 1.0                 | 0.0  | 1.40      | N/A  |    |    |
| 15      | 4                                             | -  | 4                                          | -  | 4                                     | -  | 5                                     | -  | 5                                  | -  | 5                                    | -  | 4                                 | -  | 5                                         | -  | 4                                      | -  | 1                      | -   | 5.4                 | -    | 3.74      | -    |    |    |
| 16      | 5                                             | 5  | 2                                          | 3  | 5                                     | 4  | 5                                     | 5  | 5                                  | 5  | 5                                    | 4  | 4                                 | 4  | 4                                         | 3  | 2                                      | 2  | 1                      | 1   | 5.1                 | 4.9  | 1.93      | 1.79 |    |    |
| 17      | 4                                             | 5  | 5                                          | 5  | 5                                     | 5  | 3                                     | 4  | 5                                  | 5  | 5                                    | 5  | 2                                 | 5  | 5                                         | 5  | 1                                      | 1  | 0.5                    | 1   | 4.4                 | 5.4  | 1.28      | 2.03 |    |    |
| 18      | 5                                             | 5  | 5                                          | 5  | 5                                     | 5  | 5                                     | 5  | 5                                  | 5  | 5                                    | 5  | 5                                 | 5  | 5                                         | 5  | 5                                      | 5  | 1                      | 1   | 6.0                 | 6.0  | 1.35      | 1.64 |    |    |
| 19      | -                                             | 0  | -                                          | 0  | -                                     | 1  | -                                     | 2  | -                                  | 2  | -                                    | 1  | -                                 | 1  | -                                         | 1  | -                                      | 1  | -                      | 0   | -                   | 1.0  | -         | 4.41 |    |    |
| 20      | 4                                             | -  | 1                                          | -  | 5                                     | -  | 5                                     | -  | 5                                  | -  | 4                                    | -  | 5                                 | -  | 3                                         | -  | 5                                      | -  | 1                      | 1   | 5.1                 | -    | 1.45      | -    |    |    |

ffERG: full field electroretinogram

**Supplementary table 5: Correlation between baseline and clinical criteria and overall ffERG score**

|                                     | Correlation coefficient | P value       |
|-------------------------------------|-------------------------|---------------|
| Age                                 | 0.06                    | 0.75          |
| <b>Presence of systemic disease</b> | <b>- 0.44</b>           | <b>0.014*</b> |
| Infectious etiologies               | - 0.16                  | 0.37          |
| BCVA                                | - 0.32                  | 0.08          |
| Vitreous cells                      | - 0.24                  | 0.2           |
| <b>Vitreous haze</b>                | <b>- 0.47</b>           | <b>0.008*</b> |
| OCT abnormalities                   | - 0.05                  | 0.8           |
| FFA score                           | - 0.17                  | 0.35          |

\* Statistically significant

BCVA: best corrected visual acuity; OCT: optical coherence tomography; FFA: fundus fluorescein angiography

**Supplementary table 6: Correlation between select individual fERG responses and clinical and FFA findings**

|                              | Photopic 3.0 b wave (cone) response timing |                    | 3.0 photopic 30 Hz flicker response amplitude |              | 3.0 photopic 30 Hz flicker response timing |               |
|------------------------------|--------------------------------------------|--------------------|-----------------------------------------------|--------------|--------------------------------------------|---------------|
|                              | Correlation coefficient                    | P value            | Correlation coefficient                       | P value      | Correlation coefficient                    | P value       |
| BCVA                         | <b>- 0.37</b>                              | <b>0.046*</b>      | - 0.09                                        | 0.62         | - 0.12                                     | 0.52          |
| Vitreous haze                | <b>- 0.62</b>                              | <b>&lt; 0.001*</b> | <b>- 0.39</b>                                 | <b>0.03*</b> | <b>- 0.53</b>                              | <b>0.002*</b> |
| Overall FFA score            | <b>- 0.37</b>                              | <b>0.03*</b>       | - 0.09                                        | 0.61         | <b>- 0.43</b>                              | <b>0.02*</b>  |
| Macular leakage              | - 0.19                                     | 0.3                | 0.004                                         | 0.99         | <b>- 0.39</b>                              | <b>0.03*</b>  |
| Peripheral capillary leakage | - 0.19                                     | 0.13               | - 0.08                                        | 0.67         | <b>- 0.42</b>                              | <b>0.02*</b>  |

\* Statistically significant

**fERG: full field electroretinogram; FFA: fundus fluorescein angiography; BCVA: best corrected visual acuity.**

**Supplementary table 1: ffERG Z scoring system**

| Score | ffERG response amplitude                                       | ffERG response timing                                       |
|-------|----------------------------------------------------------------|-------------------------------------------------------------|
| 5     | Amplitude within 2 Z scores (SD) from mean<br>(Normal for age) | Timing within 2 Z scores (SD) from mean<br>(Normal for age) |
| 4     | Z score $< -2, \geq -3$                                        | Z score $> 2, \leq 3$                                       |
| 3     | Z score $< -3, \geq -4$                                        | Z score $> 3, \leq 4$                                       |
| 2     | Z score $< -4, \geq -5$                                        | Z score $> 4, \leq 5$                                       |
| 1     | Z score $< -5$                                                 | Z score $> 5$                                               |
| 0     | No response                                                    | No response                                                 |

**ffERG:** full field electroretinogram; **SD:** standard deviation

**Overall ffERG score equals the mean of individual response scores + 1 for present oscillatory potential in both scotopic and photopic conditions. If oscillatory potential is present in only one condition, only +0.5 will be added.**

Supplementary table 2: Baseline clinical characteristics

| PATIENT | BCVA   |        | Lens status  |              | Vitreous cells |     | Vitreous haze |     | OCT             |                   |
|---------|--------|--------|--------------|--------------|----------------|-----|---------------|-----|-----------------|-------------------|
|         | OD     | OS     | OD           | OS           | OD             | OS  | OD            | OS  | OD              | OS                |
| 1       | 20/20  | 20/25  | Clear lens   | Pseudophakic | 0              | 0   | 0             | 1   | Normal          | Normal            |
| 2       | 20/20  | 20/20  | Clear lens   | Clear lens   | 0              | 0   | 0             | 0   | Normal          | Normal            |
| 3       | 20/25  | 20/25  | Clear lens   | Clear lens   | 1              | 1   | 1             | 1   | N/A             | N/A               |
| 4       | 20/20  | 20/50  | NS 1+        | NS 1+        | 0              | 0   | 0             | 0   | Normal          | N/A               |
| 5       | 20/20  | 20/25  | Clear lens   | Clear lens   | 0              | 0   | 0             | 0   | Normal          | Normal            |
| 6       | 20/20  | 20/20  | Clear lens   | Clear lens   | 0              | 0   | 0             | 0   | Normal          | Normal            |
| 7       | 20/40  | -      | Clear lens   | -            | 0              | -   | 0             | -   | Normal          | -                 |
| 8       | 20/20  | 20/20  | Clear lens   | Clear lens   | 0              | 0   | 0             | 2   | Normal          | Subfoveal deposit |
| 9       | 20/40  | 20/25  | NS 1+        | NS 1+        | 0              | 0   | 0.5           | 0.5 | Normal          | Normal            |
| 10      | -      | 20/20  | -            | Clear lens   | -              | 0   | -             | 0.5 | -               | Normal            |
| 11      | -      | 20/25  | -            | Clear lens   | -              | 0   | -             | 0   | -               | Normal            |
| 12      | 20/125 | 20/20  | Clear lens   | Clear lens   | 0              | 0   | 0             | 0   | Foveal thinning | Foveal thinning   |
| 13      | 20/40  | 20/20  | NS 1+        | NS 1+        | 1              | 0.5 | 1             | 0   | ERM             | Normal            |
| 14      | 20/25  | 20/25  | Clear lens   | Clear lens   | 0              | 0   | 1             | 1   | Foveal thinning | Foveal thinning   |
| 15      | 20/80  | -      | Aphakic      | -            | 0              | -   | 0             | -   | Normal          | -                 |
| 16      | 20/30  | 20/30  | Clear lens   | Clear lens   | 2              | 2   | 1             | 1   | Normal          | Normal            |
| 17      | 20/40  | 20/25  | NS 1+        | NS 1+        | 0.5            | 3   | 1             | 0.5 | ME, ERM         | ME, ERM           |
| 18      | 20/40  | 20/250 | Clear lens   | Clear lens   | 0              | 0   | 0             | 0   | Normal          | ME                |
| 19      | -      | 20/50  | -            | Clear lens   | -              | 0.5 | -             | 0   | -               | Foveal thinning   |
| 20      | 20/25  | -      | Pseudophakic | -            | 0              | -   | 0             | -   | ERM             | -                 |

BCVA: best corrected visual acuity; OCT: optical coherence tomography; OD: right eye; OS: left eye; NS: Nuclear sclerosis; ERM: epiretinal membrane; ME: macular edema



Supplementary table 3: Gradings of fundus fluorescein angiography findings

| Patient | Optic disc staining/leakage (Max 3) |    | Macular leakage (Max 4) |    | Central vascular leakage/staining (Max 3) |    | Peripheral vascular leakage/staining (Max 4) |    | Central extrafoveal capillary leakage (Max 2) |    | Peripheral capillary leakage (Max 8) |    | Macular ischemia (Max 2) |    | Peripheral ischemia (Max 4) |    | Total FFA grading* |    |
|---------|-------------------------------------|----|-------------------------|----|-------------------------------------------|----|----------------------------------------------|----|-----------------------------------------------|----|--------------------------------------|----|--------------------------|----|-----------------------------|----|--------------------|----|
|         | OD                                  | OS | OD                      | OS | OD                                        | OS | OD                                           | OS | OD                                            | OS | OD                                   | OS | OD                       | OS | OD                          | OS | OD                 | OS |
| 1       | 1                                   | 2  | 2                       | 3  | 1                                         | 1  | 2                                            | 4  | 1                                             | 2  | 4                                    | 8  | 0                        | 0  | 0                           | 0  | 11                 | 20 |
| 2       | 2                                   | 2  | 4                       | 4  | 2                                         | 2  | 4                                            | 4  | 2                                             | 2  | 8                                    | 7  | 0                        | 0  | 1                           | 1  | 23                 | 22 |
| 3       | 3                                   | 2  | 2                       | 1  | 3                                         | 3  | 4                                            | 4  | 1                                             | 1  | 6                                    | 4  | 0                        | 0  | 0                           | 0  | 19                 | 15 |
| 4       | 1                                   | 2  | 0                       | 2  | 0                                         | 0  | 0                                            | 0  | 1                                             | 1  | 4                                    | 8  | 0                        | 0  | 0                           | 1  | 6                  | 14 |
| 5       | 1                                   | 3  | 1                       | 2  | 0                                         | 0  | 1                                            | 0  | 0                                             | 1  | 6                                    | 7  | 0                        | 0  | 0                           | 1  | 9                  | 14 |
| 6       | 0                                   | 3  | 0                       | 0  | 0                                         | 0  | 4                                            | 4  | 0                                             | 0  | 0                                    | 0  | 0                        | 0  | 1                           | 0  | 5                  | 7  |
| 7       | 1                                   | -  | 0                       | -  | 0                                         | -  | 1                                            | -  | 1                                             | -  | 0                                    | -  | 0                        | -  | 0                           | -  | 3                  | -  |
| 8       | 3                                   | 2  | 2                       | 2  | 1                                         | 1  | 1                                            | 1  | 1                                             | 1  | 5                                    | 5  | 0                        | 0  | 0                           | 0  | 13                 | 12 |
| 9       | 1                                   | 1  | 0                       | 0  | 0                                         | 0  | 1                                            | 1  | 0                                             | 0  | 2                                    | 2  | 0                        | 0  | 0                           | 0  | 4                  | 4  |
| 10      | -                                   | 3  | -                       | 0  | -                                         | 2  | -                                            | 4  | -                                             | 0  | -                                    | 0  | -                        | 0  | -                           | 0  | -                  | 9  |
| 11      | -                                   | 0  | -                       | 0  | -                                         | 0  | -                                            | 3  | -                                             | 1  | -                                    | 2  | -                        | 0  | -                           | 2  | -                  | 8  |
| 12      | 1                                   | 0  | 0                       | 0  | 0                                         | 0  | 1                                            | 1  | 0                                             | 0  | 1                                    | 1  | 0                        | 0  | 0                           | 0  | 3                  | 2  |
| 13      | 3                                   | 1  | 2                       | 0  | 3                                         | 0  | 4                                            | 3  | 2                                             | 0  | 8                                    | 2  | 0                        | 0  | 0                           | 0  | 22                 | 6  |
| 14      | 3                                   | 3  | 1                       | 2  | 3                                         | 3  | 4                                            | 3  | 2                                             | 2  | 6                                    | 6  | 1                        | 0  | 2                           | 2  | 22                 | 21 |
| 15      | 2                                   | -  | 1                       | -  | 0                                         | -  | 1                                            | -  | 1                                             | -  | 4                                    | -  | 0                        | -  | 0                           | -  | 9                  | -  |
| 16      | 2                                   | 1  | 1                       | 2  | 0                                         | 1  | 4                                            | 4  | 1                                             | 1  | 6                                    | 6  | 0                        | 0  | 0                           | 1  | 14                 | 16 |
| 17      | 3                                   | 3  | 4                       | 3  | 2                                         | 2  | 4                                            | 4  | 2                                             | 2  | 8                                    | 6  | 0                        | 0  | 0                           | 0  | 23                 | 20 |
| 18      | 2                                   | 3  | 2                       | 4  | 0                                         | 0  | 0                                            | 0  | 2                                             | 2  | 6                                    | 6  | 0                        | 0  | 0                           | 1  | 12                 | 16 |
| 19      | -                                   | 3  | -                       | 0  | -                                         | 1  | -                                            | 4  | -                                             | 1  | -                                    | 7  | -                        | 0  | -                           | 0  | -                  | 16 |
| 20      | 1                                   | -  | 0                       | -  | 0                                         | -  | 2                                            | -  | 1                                             | -  | 3                                    | -  | 0                        | -  | 2                           | -  | 9                  | -  |

\* All patients did not show retinal neovascularization or pooling in their FFAs.

FFA: Fundus fluorescein angiography

Supplementary table 4: Full field electroretinogram scores

| Patient | scotopic 0.01 b wave (rod) response amplitude |    | scotopic 0.01 b wave (rod) response timing |    | scotopic 3.0 (mixed) a wave amplitude |    | scotopic 3.0 (mixed) b wave amplitude |    | scotopic 3.0 (mixed) b wave timing |    | photopic 3.0 b wave (cone) amplitude |    | photopic 3.0 b wave (cone) timing |    | 30 Hz 3.0 photopic cone flicker amplitude |    | 30 Hz 3.0 photopic cone flicker timing |    | Oscillatory potentials |    | Overall ffERG score |     | b/a ratio |      |      |    |
|---------|-----------------------------------------------|----|--------------------------------------------|----|---------------------------------------|----|---------------------------------------|----|------------------------------------|----|--------------------------------------|----|-----------------------------------|----|-------------------------------------------|----|----------------------------------------|----|------------------------|----|---------------------|-----|-----------|------|------|----|
|         | Max (5)                                       |    | Max (5)                                    |    | Max (5)                               |    | Max (5)                               |    | Max (5)                            |    | Max (5)                              |    | Max (5)                           |    | Max (5)                                   |    | Max (5)                                |    | Max (1)                |    | Max (6)             |     |           |      |      |    |
|         | OD                                            | OS | OD                                         | OS | OD                                    | OS | OD                                    | OS | OD                                 | OS | OD                                   | OS | OD                                | OS | OD                                        | OS | OD                                     | OS | OD                     | OS | OD                  | OS  | OD        | OS   | OD   | OS |
| 1       | 4                                             | 5  | 4                                          | 4  | 4                                     | 4  | 5                                     | 5  | 5                                  | 5  | 5                                    | 5  | 5                                 | 4  | 4                                         | 4  | 5                                      | 1  | 1                      | 1  | 5.6                 | 5.1 | 3.39      | 2.64 |      |    |
| 2       | 5                                             | 5  | 2                                          | 5  | 5                                     | 5  | 5                                     | 5  | 5                                  | 5  | 5                                    | 5  | 5                                 | 5  | 5                                         | 5  | 2                                      | 2  | 1                      | 1  | 5.3                 | 5.7 | 2.37      | 2.82 |      |    |
| 3       | 5                                             | 5  | 5                                          | 5  | 5                                     | 5  | 5                                     | 5  | 5                                  | 5  | 5                                    | 5  | 3                                 | 5  | 5                                         | 3  | 3                                      | 4  | 5                      | 1  | 1                   | 5.7 | 5.6       | 1.63 | 2.34 |    |
| 4       | 5                                             | 5  | 5                                          | 2  | 5                                     | 3  | 5                                     | 5  | 5                                  | 5  | 5                                    | 5  | 5                                 | 5  | 5                                         | 3  | 5                                      | 1  | 1                      | 1  | 6.0                 | 4.8 | 2.79      | 4.20 |      |    |
| 5       | 5                                             | 5  | 5                                          | 4  | 5                                     | 5  | 5                                     | 5  | 5                                  | 5  | 5                                    | 5  | 5                                 | 5  | 5                                         | 5  | 5                                      | 4  | 1                      | 1  | 6.0                 | 5.8 | 1.86      | 2.09 |      |    |
| 6       | 5                                             | 5  | 5                                          | 5  | 5                                     | 5  | 5                                     | 5  | 5                                  | 5  | 5                                    | 5  | 5                                 | 5  | 5                                         | 5  | 5                                      | 5  | 1                      | 1  | 6.0                 | 6.0 | 1.60      | 1.64 |      |    |
| 7       | 4                                             | -  | 0                                          | -  | 2                                     | -  | 5                                     | -  | 5                                  | -  | 3                                    | -  | 5                                 | -  | 5                                         | -  | 3                                      | -  | 1                      | -  | 4.6                 | -   | 2.86      | -    |      |    |
| 8       | 4                                             | 5  | 5                                          | 5  | 4                                     | 5  | 5                                     | 5  | 5                                  | 5  | 4                                    | 4  | 4                                 | 4  | 3                                         | 4  | 1                                      | 2  | 1                      | 1  | 4.9                 | 5.3 | 2.03      | 1.69 |      |    |
| 9       | 5                                             | 2  | 5                                          | 5  | 5                                     | 5  | 1                                     | 1  | 5                                  | 5  | 1                                    | 1  | 3                                 | 4  | 3                                         | 4  | 2                                      | 1  | 1                      | 1  | 4.3                 | 4.1 | 1.16      | 0.36 |      |    |
| 10      | -                                             | 5  | -                                          | 5  | -                                     | 5  | -                                     | 5  | -                                  | 5  | -                                    | 5  | -                                 | 5  | -                                         | 5  | -                                      | 1  | -                      | 1  | -                   | 5.6 | -         | 2.20 |      |    |
| 11      | -                                             | 4  | -                                          | 5  | -                                     | 3  | -                                     | 5  | -                                  | 5  | -                                    | 5  | -                                 | 5  | -                                         | 4  | -                                      | 5  | -                      | 1  | -                   | 5.6 | -         | 2.12 |      |    |
| 12      | 5                                             | 5  | 5                                          | 5  | 5                                     | 5  | 5                                     | 5  | 5                                  | 5  | 4                                    | 4  | 5                                 | 5  | 5                                         | 5  | 5                                      | 4  | 1                      | 1  | 5.9                 | 5.8 | 1.53      | 1.50 |      |    |
| 13      | 5                                             | 5  | 1                                          | 2  | 5                                     | 5  | 5                                     | 5  | 5                                  | 5  | 5                                    | 4  | 3                                 | 5  | 5                                         | 5  | 1                                      | 5  | 1                      | 1  | 4.9                 | 5.6 | 2.05      | 1.85 |      |    |
| 14      | 0                                             | 0  | 0                                          | 0  | 1                                     | 0  | 1                                     | 0  | 5                                  | 0  | 0                                    | 0  | 0                                 | 0  | 1                                         | 0  | 1                                      | 0  | 0                      | 0  | 1.0                 | 0.0 | 1.40      | N/A  |      |    |
| 15      | 4                                             | -  | 4                                          | -  | 4                                     | -  | 5                                     | -  | 5                                  | -  | 5                                    | -  | 4                                 | -  | 5                                         | -  | 4                                      | -  | 1                      | -  | 5.4                 | -   | 3.74      | -    |      |    |
| 16      | 5                                             | 5  | 2                                          | 3  | 5                                     | 4  | 5                                     | 5  | 5                                  | 5  | 5                                    | 4  | 4                                 | 4  | 4                                         | 3  | 2                                      | 2  | 1                      | 1  | 5.1                 | 4.9 | 1.93      | 1.79 |      |    |
| 17      | 4                                             | 5  | 5                                          | 5  | 5                                     | 5  | 3                                     | 4  | 5                                  | 5  | 5                                    | 5  | 2                                 | 5  | 5                                         | 5  | 1                                      | 1  | 0.5                    | 1  | 4.4                 | 5.4 | 1.28      | 2.03 |      |    |
| 18      | 5                                             | 5  | 5                                          | 5  | 5                                     | 5  | 5                                     | 5  | 5                                  | 5  | 5                                    | 5  | 5                                 | 5  | 5                                         | 5  | 5                                      | 5  | 1                      | 1  | 6.0                 | 6.0 | 1.35      | 1.64 |      |    |
| 19      | -                                             | 0  | -                                          | 0  | -                                     | 1  | -                                     | 2  | -                                  | 2  | -                                    | 1  | -                                 | 1  | -                                         | 1  | -                                      | 1  | -                      | 0  | -                   | 1.0 | -         | 4.41 |      |    |
| 20      | 4                                             | -  | 1                                          | -  | 5                                     | -  | 5                                     | -  | 5                                  | -  | 4                                    | -  | 5                                 | -  | 3                                         | -  | 5                                      | -  | 1                      | 1  | 5.1                 | -   | 1.45      | -    |      |    |

ffERG: full field electroretinogram

**Supplementary table 5: Correlation between baseline and clinical criteria and overall ffERG score**

|                                     | Correlation coefficient | P value       |
|-------------------------------------|-------------------------|---------------|
| Age                                 | 0.06                    | 0.75          |
| <b>Presence of systemic disease</b> | <b>- 0.44</b>           | <b>0.014*</b> |
| Infectious etiologies               | - 0.16                  | 0.37          |
| BCVA                                | - 0.32                  | 0.08          |
| Vitreous cells                      | - 0.24                  | 0.2           |
| <b>Vitreous haze</b>                | <b>- 0.47</b>           | <b>0.008*</b> |
| OCT abnormalities                   | - 0.05                  | 0.8           |
| FFA score                           | - 0.17                  | 0.35          |

\* Statistically significant

BCVA: best corrected visual acuity; OCT: optical coherence tomography; FFA: fundus fluorescein angiography

**Supplementary table 6: Correlation between select individual fERG responses and clinical and FFA findings**

|                              | Photopic 3.0 b wave (cone) response timing |                    | 3.0 photopic 30 Hz flicker response amplitude |              | 3.0 photopic 30 Hz flicker response timing |               |
|------------------------------|--------------------------------------------|--------------------|-----------------------------------------------|--------------|--------------------------------------------|---------------|
|                              | Correlation coefficient                    | P value            | Correlation coefficient                       | P value      | Correlation coefficient                    | P value       |
| BCVA                         | <b>- 0.37</b>                              | <b>0.046*</b>      | - 0.09                                        | 0.62         | - 0.12                                     | 0.52          |
| Vitreous haze                | <b>- 0.62</b>                              | <b>&lt; 0.001*</b> | <b>- 0.39</b>                                 | <b>0.03*</b> | <b>- 0.53</b>                              | <b>0.002*</b> |
| Overall FFA score            | <b>- 0.37</b>                              | <b>0.03*</b>       | - 0.09                                        | 0.61         | <b>- 0.43</b>                              | <b>0.02*</b>  |
| Macular leakage              | - 0.19                                     | 0.3                | 0.004                                         | 0.99         | <b>- 0.39</b>                              | <b>0.03*</b>  |
| Peripheral capillary leakage | - 0.19                                     | 0.13               | - 0.08                                        | 0.67         | <b>- 0.42</b>                              | <b>0.02*</b>  |

\* Statistically significant

**fERG: full field electroretinogram; FFA: fundus fluorescein angiography; BCVA: best corrected visual acuity.**
